---

## Corrections

### *Systems-level feedback in cell-cycle control*

By BÉLA NOVÁK, P.K. VINOD, PAULA FREIRE and  
ORSOLYA KAPUY

Volume 38 Part 5 (2010) 1242–1246

In this paper, Cdh1 was defined incorrectly. In the context of this paper, it should be defined as Cdc20 homologue 1.

### *Shared paramyxoviral glycoprotein architecture is adapted for diverse attachment strategies*

By THOMAS A. BOWDEN, MAX CRISPIN,  
E. YVONNE JONES and DAVID I. STUART

Volume 38 Part 5 (2010) 1349–1355

In the correspondence footnote, the email address given for Thomas Bowden was incorrect. It should read Tom@strubi.ox.ac.uk.
